# Supplementary material
Source: PubMed Central journal article supplement (PMC2836584)
Supplement: NIHMS178482-supplement-1.pdf [file NIHMS178482-supplement-1.pdf]

**A**

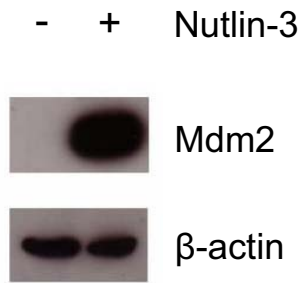

**B**

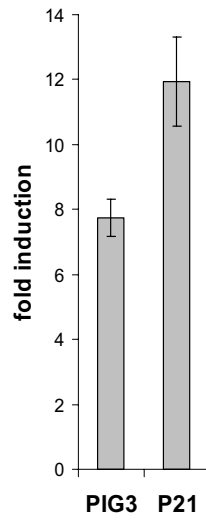

**A**

**A**

TATGTTTAAATGGTGTATCAAGCTGTAACAGCAACTCCATGTGGACTGTGTACCAATTTCCAG  
 TGGAGATGCTGTACTTTTGTATGGTTACCAACTTGCTACAATATAAAGGTATAATAAAGAAA  
 GACAGAAAATTGTGGTCACTTGGACTCTCAITTTGATTCACGACAGAAAAAAGATTTTCAGCC  
 TGTTTTATAAAATTAAACAAATGATTAAGAATTAATATCAATTTTCTTAAATTCAGTTTTGT  
 AACACCAAAAAGATCCAATAATGGAAGAGGATTAAGTTCATCAITTCAGAAATGGTATACAGG  
 AAACTGACCTATGAATTGACAGACAAATATAGCTGAGTTTGTCTGTCAITTTCTTTAGGCCAAT  
 ATTCTGTATGACTGTGCTACTTCAATATCAGAAATCGACTAACACCACGCAACCAACGCAAT  
 GGCAGGTACACAGAAGATAATCTGTAACACTACCATG

**B**

**A**

CCCCGGTCTCCAATTGGTTCCCGCCCCCTGTAACAGCAACTCCATGTGGAAAGTGCCCACTGG  
 TTCCAGTGGGGCTGCTGTTATCTGGGGCGAGGGCCAGTACCACGAAGAAGGAGAGGCAGGT  
 GCTGGCCAGCAGACCAGCCAGGACTACCGTGGCGACGCTCCCAGGCCAGATGGTGGCGGGTA  
 GTGGAGGGCTGTGGTGGGCTGCCGAGACCGAGTGCACAGGGCTCTGACCTATGAATTGACA  
 GCCAGTGCTCTCGTCTCCCCTCTGGCTGCCAATTCATAGGTACAGGTATGTTTCGCCTCAA  
 TGCCAGCCACCAGGACCTGCAGGGATAGGGG

**B**

**C**

|               |       |                         |
|---------------|-------|-------------------------|
| Chromosome 1  | 194-1 | UGU AACAGCAACUCCAUGUGGA |
|               | 215   | AUGACCUAUGAAUUGACAGAC   |
| Chromosome 11 | 194-2 | UGU AACAGCAACUCCAUGUGGA |
|               | 192   | CUGACCUAUGAAUUGACAGCC   |

Supplementary Figure S2

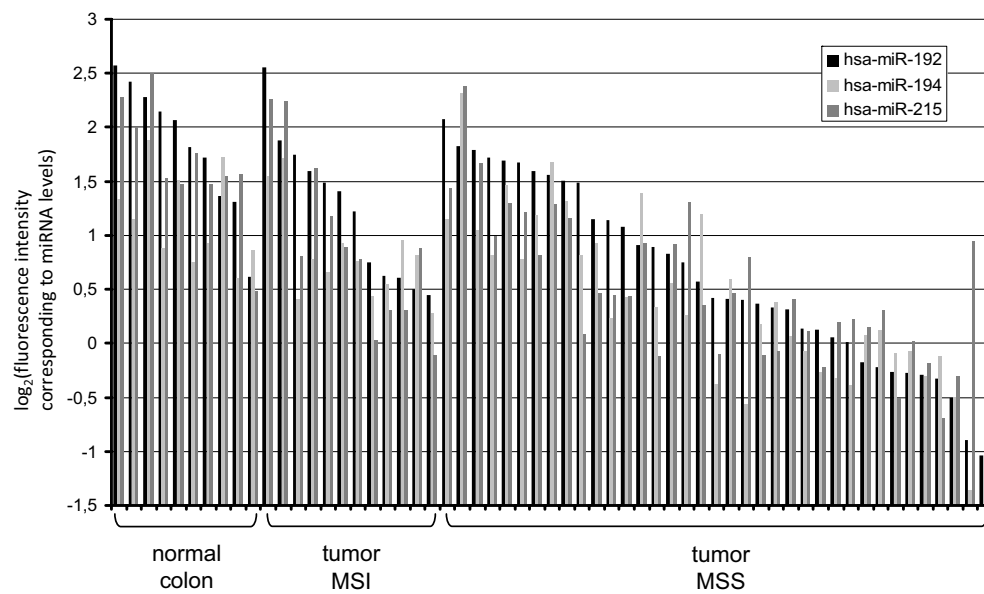

Supplementary Figure S3

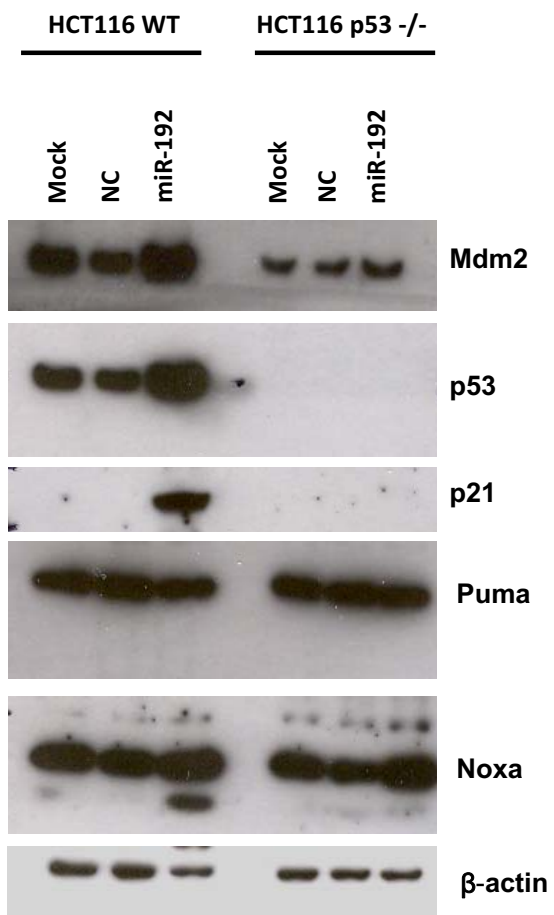

Supplementary Figure S4

A549

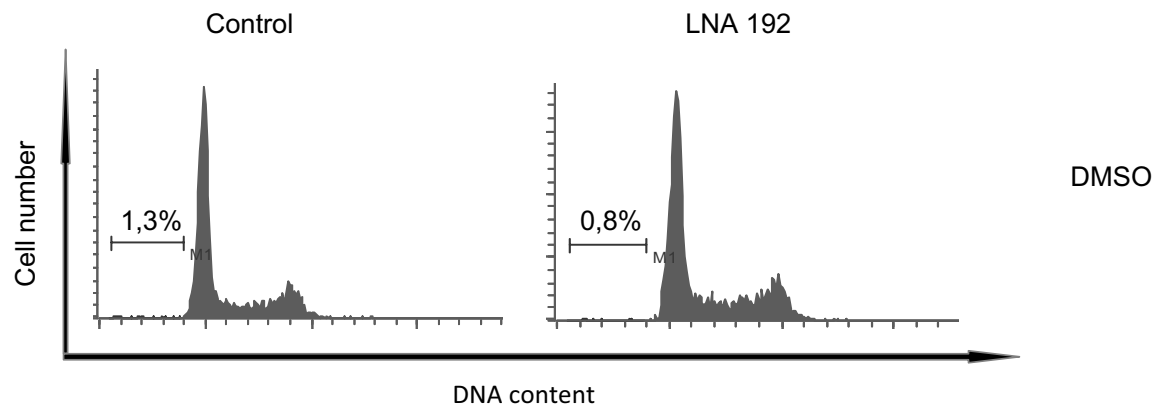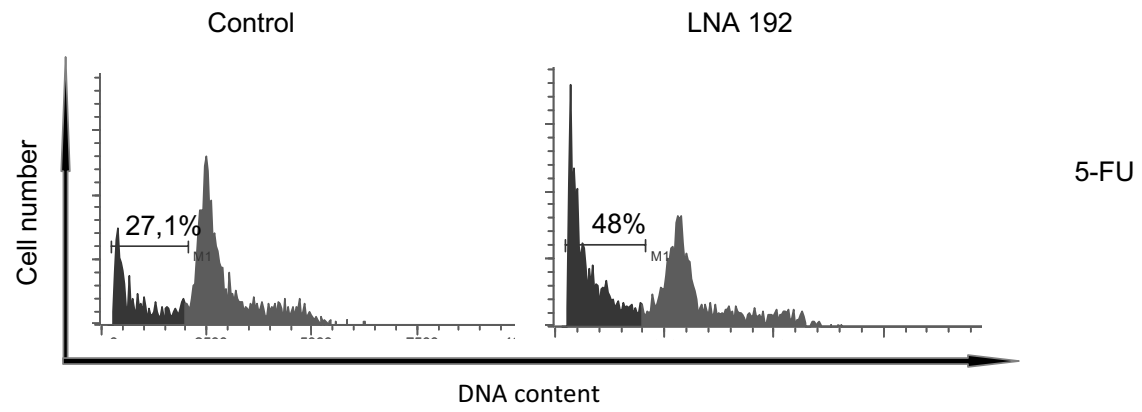

Supplementary Figure S5

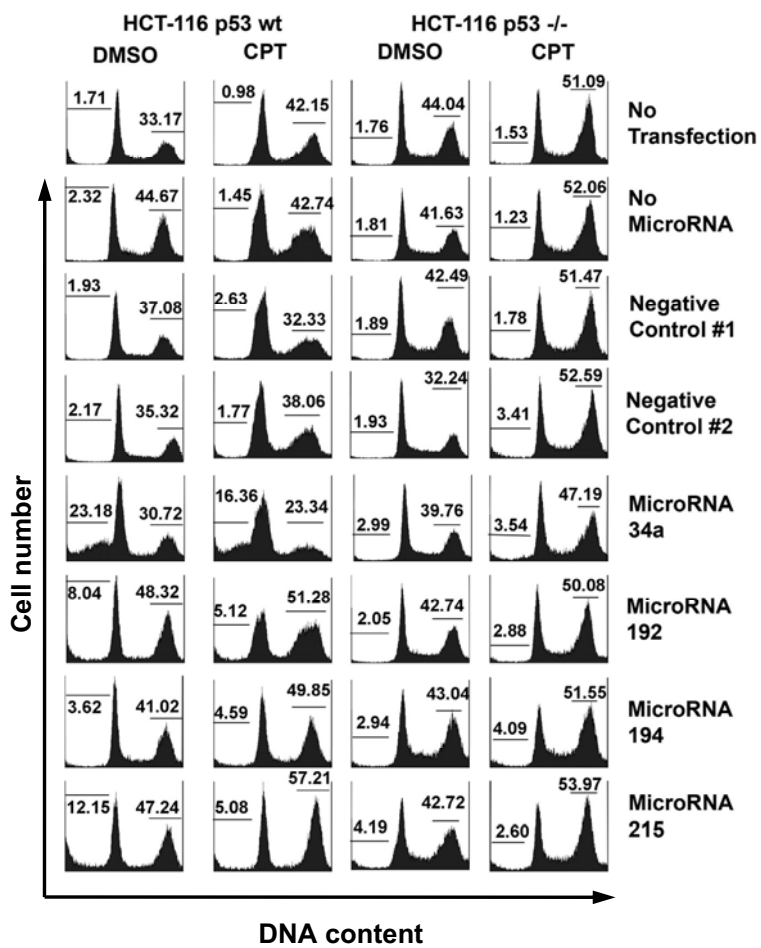

Supplementary Figure S6

HCT 116 p21<sup>-/-</sup>

**A**

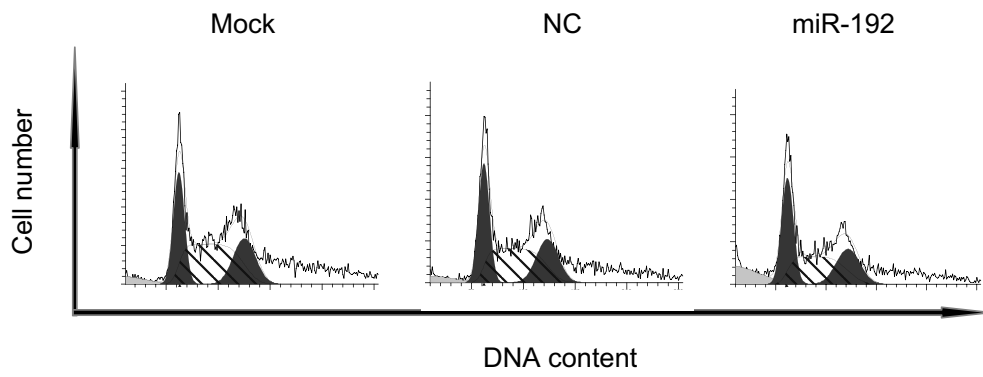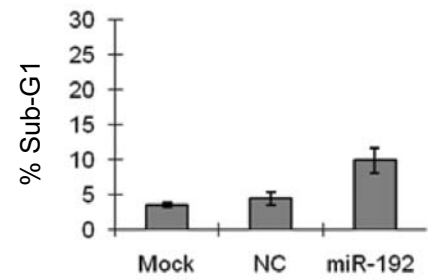

**B**

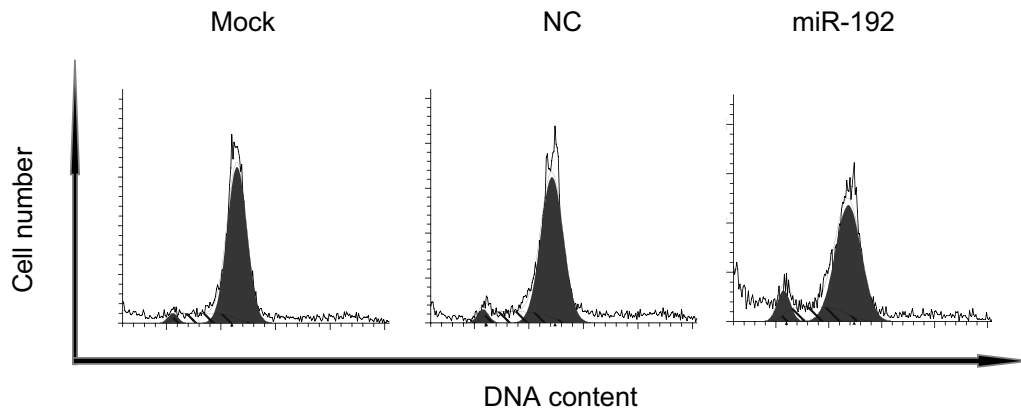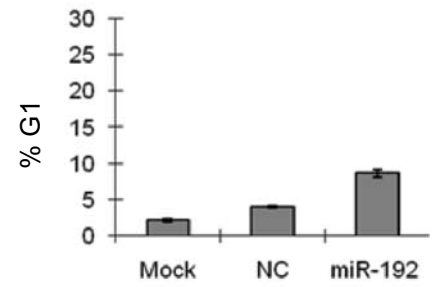

Supplementary Figure S7

A549

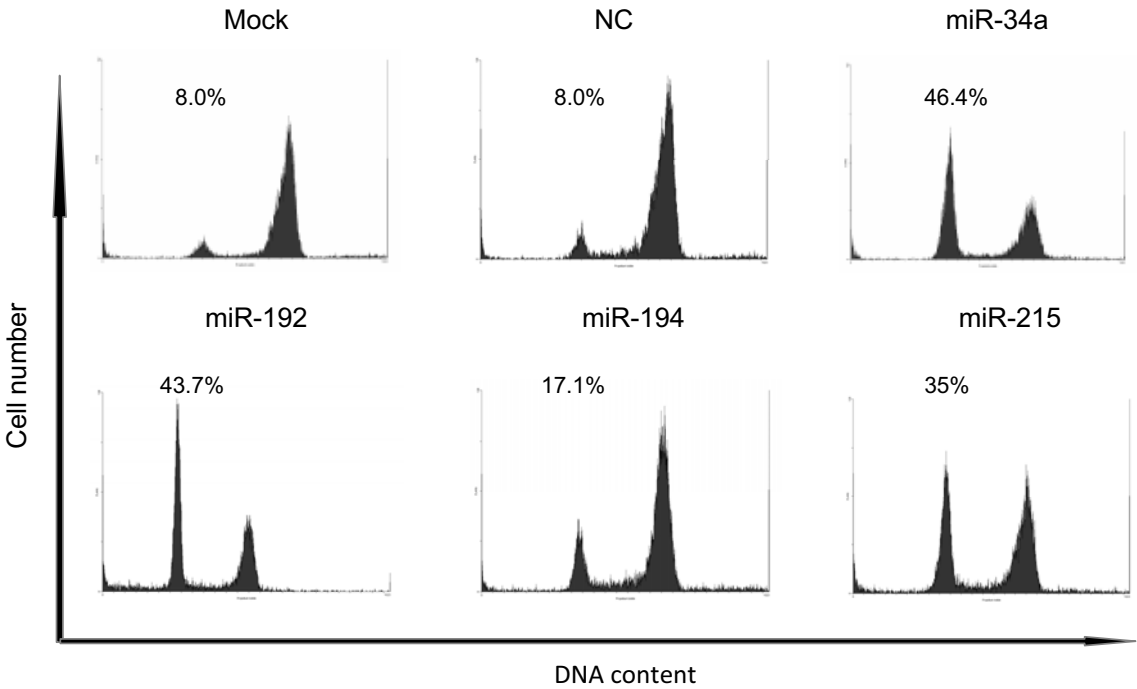

Supplementary Figure S8
