# Supplementary material
Source: PubMed Central journal article supplement (PMC2836584)
Supplement: NIHMS178482-supplement-2.pdf [file NIHMS178482-supplement-2.pdf]

**Supplementary Table S2:** microRNA expression levels in patient material

|            | hsa-miR-192 | hsa-miR-194 | hsa-miR-215 |
|------------|-------------|-------------|-------------|
| norm       | 2,0638032   | 1,5153191   | 1,48113355  |
| norm       | 1,7159519   | 0,9314417   | 1,48201367  |
| norm       | 2,4237418   | 1,15437485  | 2,0054486   |
| norm       | 1,3093104   | 0,60965708  | 1,5688438   |
| norm       | 2,28276815  | 1,8816831   | 2,501659    |
| norm       | 1,3663578   | 1,73083455  | 1,5539459   |
| norm       | 2,57213915  | 1,34121695  | 2,27546925  |
| norm       | 1,8183496   | 0,75325969  | 1,76791845  |
| norm       | 2,1470934   | 0,88221417  | 1,5303923   |
| norm       | 0,6136519   | 0,8631431   | 0,48074918  |
| tumor(msi) | 1,8766603   | 1,71952995  | 2,2397269   |
| tumor(msi) | 0,6055992   | 0,9547181   | 0,30595577  |
| tumor(msi) | 1,5960565   | 0,7864509   | 1,6201423   |
| tumor(msi) | 1,4866753   | 0,65808228  | 1,17429385  |
| tumor(msi) | 1,22170515  | 0,75781668  | 0,77365143  |
| tumor(msi) | 1,74498175  | 0,40964055  | 0,8120211   |
| tumor(msi) | 2,55591775  | 1,55431825  | 2,26450145  |
| tumor(msi) | 0,49823779  | 0,82358502  | 0,88599772  |
| tumor(msi) | 0,62808125  | 0,54358564  | 0,30950524  |
| tumor(msi) | 0,74787537  | 0,43729453  | 0,03271008  |
| tumor(msi) | 0,45132125  | 0,28162069  | -0,10142288 |
| tumor(msi) | 1,4113954   | 0,9265341   | 0,89280251  |
| tumor(mss) | 1,67090915  | 0,77958355  | 1,2134277   |
| tumor(mss) | 1,1499832   | 0,92768905  | 0,46387968  |
| tumor(mss) | 1,6910089   | 1,4582801   | 1,29837605  |
| tumor(mss) | 1,0827973   | 0,43176628  | 0,43445475  |
| tumor(mss) | 0,91307112  | 1,3869114   | 0,92615645  |
| tumor(mss) | 0,57053094  | 1,19275158  | 0,35472457  |
| tumor(mss) | 0,74724195  | 0,26004103  | 1,30826805  |
| tumor(mss) | 0,12372817  | -0,26139771 | -0,22094626 |
| tumor(mss) | 0,13473452  | -0,06386546 | 0,12291722  |
| tumor(mss) | 2,0740297   | 1,1464771   | 1,43251125  |
| tumor(mss) | 1,488688    | 0,82451303  | 0,0807231   |
| tumor(mss) | 0,40764932  | 0,5992776   | 0,46919059  |
| tumor(mss) | 1,7921693   | 1,04906345  | 1,6621124   |
| tumor(mss) | -0,26000259 | -0,08759943 | -0,50786529 |
| tumor(mss) | -0,28762536 | -0,29722723 | -0,18669941 |
| tumor(mss) | 0,42191392  | -0,38167384 | -0,0967169  |
| tumor(mss) | -0,2172365  | 0,12813674  | 0,30908939  |
| tumor(mss) | -0,1773502  | 0,07138739  | 0,15630861  |
| tumor(mss) | -1,03883305 | -1,04288225 | -0,79035719 |
| tumor(mss) | -0,50034824 | -0,49950495 | -0,29685592 |
| tumor(mss) | 0,40043542  | -0,55790758 | 0,80496671  |
| tumor(mss) | -0,89780878 | -1,35741585 | 0,94816688  |
| tumor(mss) | 0,31230966  | 0,06276999  | 0,4089695   |
| tumor(mss) | -0,3292109  | -0,10904376 | -0,69383673 |
| tumor(mss) | 1,14422802  | 0,23461212  | 0,44779259  |
| tumor(mss) | 0,83448499  | 0,55384723  | 0,91792252  |
| tumor(mss) | 0,0079042   | -0,39010499 | 0,22346742  |
| tumor(mss) | 0,05542948  | -0,31886482 | 0,19962412  |
| tumor(mss) | 1,5017141   | 1,3201504   | 1,1567047   |
| tumor(mss) | 1,5608522   | 1,6802579   | 1,29109075  |
| tumor(mss) | 1,82372025  | 2,3180964   | 2,3881094   |
| tumor(mss) | 0,33605034  | 0,38943483  | -0,06595788 |
| tumor(mss) | 1,59330835  | 1,1893626   | 0,81730255  |
| tumor(mss) | -0,27542279 | -0,06666825 | 0,01815338  |
| tumor(mss) | 1,7203961   | 0,82006874  | 1,00257415  |
| tumor(mss) | 0,36359143  | 0,17750317  | -0,10117846 |
| tumor(mss) | 0,88895715  | 0,34422964  | -0,11658793 |

**Supplementary Table S3: Clinical & histopathological data for 59 samples used for miRNA expression profiling**

| Used for recurrence classification analysis | Material | Sample ID | Location | Age § | Gender | MSS/MSI status | Histological type | Grade | pT | pN | UICC stage | Follow-Up time until distant recurrence (months)* | Recurrence Censored (1=recur, 0=non-recur)** | Survival (months) | Survival Censored (1=dead, 0=alive) |
|---------------------------------------------|----------|-----------|----------|-------|--------|----------------|-------------------|-------|----|----|------------|---------------------------------------------------|----------------------------------------------|-------------------|-------------------------------------|
| yes                                         | Tumor    | R111      | colon    | 37    | m      | MSS            | AC                | 2     | 4  | 0  | 2          | 5                                                 | 1                                            | 14                | 1                                   |
| yes                                         | Tumor    | R047      | colon    | 58    | m      | MSS            | AC                | 2     | 3  | 0  | 2          | 6                                                 | 1                                            | 6                 | 0                                   |
| yes                                         | Tumor    | R093      | colon    | 57    | f      | MSS            | AC                | 2     | 4  | 0  | 2          | 10                                                | 1                                            | 30                | 1                                   |
| yes                                         | Tumor    | R080      | colon    | 69    | m      | MSS            | AC                | 2     | 4  | 0  | 2          | 10                                                | 1                                            | 16                | 1                                   |
| yes                                         | Tumor    | R083      | colon    | 67    | f      | MSS            | AC                | 2     | 4  | 0  | 2          | 11                                                | 1                                            | 25                | 1                                   |
| yes                                         | Tumor    | R151      | colon    | 67    | f      | MSS            | AC                | 2     | 3  | 0  | 2          | 12                                                | 1                                            | 12                | 0                                   |
|                                             | Tumor    | R089      | colon    | 79    | m      | MSS            | AC                | 2     | 4  | 0  | 2          | 13                                                | 0                                            | 13                | 1                                   |
| yes                                         | Tumor    | R072      | colon    | 36    | f      | MSS            | AC                | 3     | 4  | 0  | 2          | 15                                                | 1                                            | 15                | 0                                   |
| yes                                         | Tumor    | R102      | colon    | 81    | m      | MSS            | AC                | 3     | 4  | 0  | 2          | 19                                                | 1                                            | 46                | 1                                   |
| yes                                         | Tumor    | R013      | colon    | 65    | m      | MSS            | AC                | 2     | 3  | 0  | 2          | 19                                                | 1                                            | 19                | 0                                   |
| yes                                         | Tumor    | R123      | colon    | 44    | m      | MSS            | AC                | 2     | 4  | 0  | 2          | 24                                                | 1                                            | 29                | 1                                   |
|                                             | Tumor    | R002      | colon    | 70    | f      | MSI            | MAC               | 1     | 3  | 0  | 2          | 32                                                | 1                                            | 32                | 0                                   |
|                                             | Tumor    | R077      | colon    | 39    | m      | MSI            | AC                | 1     | 4  | 0  | 2          | 42                                                | 1                                            | 42                | 0                                   |
| yes                                         | Tumor    | R087      | colon    | 79    | m      | MSS            | AC                | 0     | 3  | 0  | 2          | 43                                                | 1                                            | 62                | 1                                   |
|                                             | Tumor    | R094      | colon    | 75    | m      | MSS            | AC                | 3     | 4  | 0  | 2          | 44                                                | 0                                            | 44                | 1                                   |
|                                             | Tumor    | R079      | colon    | 65    | m      | MSS            | AC                | NA    | 4  | 0  | 2          | 46                                                | 0                                            | 46                | 1                                   |
| yes                                         | Tumor    | R351-2    | colon    | 81    | f      | MSS            | AC                | 1     | 3  | 0  | 2          | 51                                                | 1                                            | 51                | 0                                   |
|                                             | Tumor    | R010      | colon    | 61    | f      | MSI            | AC                | 2     | 3  | 0  | 2          | 52                                                | 0                                            | 83                | 0                                   |
| yes                                         | Tumor    | R025      | colon    | 80    | f      | MSS            | AC                | 2     | 3  | 0  | 2          | 53                                                | 0                                            | 70                | 0                                   |
|                                             | Tumor    | R021      | colon    | 81    | m      | MSI            | AC                | 2     | 3  | 0  | 2          | 53                                                | 0                                            | 73                | 0                                   |
| yes                                         | Tumor    | R152      | colon    | 70    | f      | MSS            | AC                | 2     | 3  | 0  | 2          | 53                                                | 1                                            | 53                | 0                                   |
| yes                                         | Tumor    | R005      | colon    | 72    | m      | MSS            | AC                | 1     | 3  | 0  | 2          | 56                                                | 0                                            | 93                | 0                                   |
| yes                                         | Tumor    | R003      | colon    | 56    | m      | MSS            | AC                | 3     | 4  | 0  | 2          | 60                                                | 0                                            | 93                | 0                                   |
|                                             | Tumor    | R135      | colon    | 80    | m      | MSS            | AC                | 2     | 3  | 0  | 2          | 61                                                | 1                                            | 61                | 0                                   |
|                                             | Tumor    | R056      | colon    | 87    | f      | MSI            | AC                | 3     | 4  | 0  | 2          | 62                                                | 0                                            | 62                | 1                                   |
|                                             | Tumor    | R016      | colon    | 58    | m      | MSI            | AC                | 1     | 3  | 0  | 2          | 64                                                | 0                                            | 90                | 0                                   |
|                                             | Tumor    | R018      | colon    | 84    | m      | MSI            | MAC               | 3     | 4  | 0  | 2          | 67                                                | 0                                            | 81                | 1                                   |
|                                             | Tumor    | R020      | colon    | 67    | m      | MSI            | AC                | 2     | 3  | 0  | 2          | 67                                                | 1                                            | 67                | 0                                   |
|                                             | Tumor    | R073      | colon    | 73    | f      | MSI            | AC                | 3     | 3  | 0  | 2          | 68                                                | 0                                            | 68                | 0                                   |
| yes                                         | Tumor    | R024      | colon    | 78    | m      | MSS            | AC                | 2     | 3  | 0  | 2          | 70                                                | 0                                            | 73                | 0                                   |

|     |        |         |       |    |   |     |    |   |   |   |   |     |   |     |   |
|-----|--------|---------|-------|----|---|-----|----|---|---|---|---|-----|---|-----|---|
| yes | Tumor  | R160    | colon | 86 | f | MSS | AC | 2 | 3 | 0 | 2 | 71  | 0 | 71  | 0 |
| yes | Tumor  | R078    | colon | 68 | m | MSS | AC | 2 | 3 | 0 | 2 | 75  | 0 | 75  | 0 |
| yes | Tumor  | R098    | colon | 69 | f | MSS | AC | 3 | 4 | 0 | 2 | 75  | 0 | 75  | 0 |
| yes | Tumor  | R082    | colon | 46 | f | MSS | AC | 2 | 4 | 0 | 2 | 77  | 0 | 77  | 0 |
| yes | Tumor  | R158    | colon | 67 | m | MSS | AC | 2 | 4 | 0 | 2 | 77  | 0 | 77  | 0 |
|     | Tumor  | R168    | colon | 67 | f | MSS | AC | 2 | 3 | 0 | 2 | 80  | 1 | 83  | 1 |
|     | Tumor  | R141    | colon | 50 | m | MSS | AC | 2 | 3 | 0 | 2 | 80  | 1 | 80  | 0 |
|     | Tumor  | R023    | colon | 69 | f | MSI | AC | 2 | 3 | 0 | 2 | 87  | 0 | 87  | 0 |
|     | Tumor  | R009    | colon | 79 | f | MSI | AC | 1 | 3 | 0 | 2 | 89  | 0 | 89  | 1 |
| yes | Tumor  | R004    | colon | 64 | m | MSS | AC | 2 | 3 | 0 | 2 | 95  | 0 | 95  | 0 |
| yes | Tumor  | R095    | colon | 66 | m | MSS | AC | 1 | 4 | 0 | 2 | 95  | 0 | 95  | 0 |
| yes | Tumor  | R162    | colon | 47 | f | MSS | AC | 2 | 3 | 0 | 2 | 95  | 0 | 95  | 0 |
| yes | Tumor  | R085    | colon | 83 | m | MSS | AC | 2 | 3 | 0 | 2 | 104 | 0 | 104 | 0 |
| yes | Tumor  | R086    | colon | 56 | f | MSS | AC | 2 | 4 | 0 | 2 | 104 | 0 | 104 | 0 |
|     | Tumor  | R040    | colon | 52 | m | MSI | AC | 3 | 3 | 0 | 2 | 111 | 0 | 111 | 0 |
| yes | Tumor  | R097    | colon | 56 | f | MSS | AC | 2 | 4 | 0 | 2 | 117 | 0 | 117 | 0 |
| yes | Tumor  | R007    | colon | 63 | f | MSS | AC | 2 | 3 | 0 | 2 | 132 | 0 | 132 | 0 |
| yes | Tumor  | R006    | colon | 58 | m | MSS | AC | 3 | 3 | 0 | 2 | 135 | 0 | 135 | 0 |
| yes | Tumor  | R088    | colon | 56 | f | MSS | AC | 2 | 4 | 0 | 2 | 148 | 0 | 148 | 0 |
|     | Normal | A096-01 | colon | 60 | m | -   | -  | - | - | - | - | -   | - | -   | - |
|     | Normal | A096-02 | colon | 69 | m | -   | -  | - | - | - | - | -   | - | -   | - |
|     | Normal | A096-03 | colon | 72 | f | -   | -  | - | - | - | - | -   | - | -   | - |
|     | Normal | A096-04 | colon | 58 | m | -   | -  | - | - | - | - | -   | - | -   | - |
|     | Normal | A096-05 | colon | 61 | m | -   | -  | - | - | - | - | -   | - | -   | - |
|     | Normal | A096-06 | colon | 73 | m | -   | -  | - | - | - | - | -   | - | -   | - |
|     | Normal | A096-07 | colon | 83 | m | -   | -  | - | - | - | - | -   | - | -   | - |
|     | Normal | A096-08 | colon | 52 | m | -   | -  | - | - | - | - | -   | - | -   | - |
|     | Normal | A096-09 | colon | 61 | m | -   | -  | - | - | - | - | -   | - | -   | - |
|     | Normal | A096-10 | colon | 85 | f | -   | -  | - | - | - | - | -   | - | -   | - |

Abbreviations: m=male, f=female, MSS=microsatellite stable, MSI= microsatellite unstable, AC=adenocarcinoma, MAC=mucinous adenocarcinoma, NA=not available/applicable

§ Age at time of surgery

\* follow-up time until distant metastasis, or the present follow-up for cases where metastasis has not yet occurred - see the recurrence censored column.

\*\*recurrence=histopathological verified recurrence to the liver and/or lung

**Supplementary table S4: Differential expression of hsa-miR192, hsa-miR194, and hsa-miR215 in normal mucosa compare to MSS and MSI colon cancer**

|             | normal vs MSS    |             |              | normal vs MSI    |             |              |
|-------------|------------------|-------------|--------------|------------------|-------------|--------------|
|             | <i>p</i> -value* | Regulation§ | Fold (log2)# | <i>p</i> -value* | Regulation§ | Fold (log2)# |
| hsa-miR-192 | 0,0002           | down        | -1,5         | 0,0479           | down        | -0,6         |
| hsa-miR-194 | 0,0028           | down        | -0,8         | 0,0649           | down        | -0,3         |
| hsa-miR-215 | <0.0001          | down        | -1,2         | 0,0296           | down        | -0,7         |

\*Mann-Whitney U test

§ Regulation (up or down) is stated as miRNA expression in MSS (or MSI) cancer relative to normal mucosa.

# fold changes are calculated as the median log2 fold change between the groups compared.
